1 **MetFish: A Metabolomics Platform for Studying Microbial Communities in Chemically**

2 **Extreme Environments**

3

4 Chengdong Xu<sup>1</sup>, Sneha P. Couvillion<sup>1</sup>, Ryan L. Sontag<sup>1</sup>, Nancy G. Isern<sup>1</sup>, Yukari Maezato<sup>1</sup>,  
5 Stephen R. Lindemann<sup>1,#</sup>, Taniya Roy Chowdhury<sup>1</sup>, Rui Zhao<sup>1</sup>, Beau R. Morton<sup>1</sup>, Ronald J.  
6 Moore<sup>1</sup>, Janet K. Jansson<sup>1</sup>, Vanessa L. Bailey<sup>1</sup>, Paula J. Mouser<sup>2</sup>, Margaret F. Romine<sup>1</sup>, James F.  
7 Fredrickson<sup>1</sup>, and Thomas O. Metz<sup>1,\*</sup>

8

9 <sup>1</sup>Earth and Biological Sciences Directorate, Pacific Northwest National Laboratory, Richland,  
10 WA, USA

11 <sup>2</sup>Department of Civil and Environmental Engineering, University of New Hampshire, Durham,  
12 NH, USA

13 <sup>#</sup>Current address: Whistler Center for Carbohydrate Research, Department of Food Science, and  
14 Department of Nutrition Science, Purdue University, West Lafayette, IN, USA

15

16

17

18 \*Corresponding author: [thomas.metz@pnnl.gov](mailto:thomas.metz@pnnl.gov)

19

20

21 **Metabolites have essential roles in microbial communities, including as mediators of**  
22 **nutrient and energy exchange, cell-to-cell communication, and antibiosis. However,**  
23 **detecting and quantifying metabolites and other chemicals in samples having extremes in**  
24 **salt or mineral content using liquid chromatography-mass spectrometry (LC-MS)-based**  
25 **methods remains a significant challenge. Here we report a facile method based on *in situ***  
26 **chemical derivatization followed by extraction for analysis of metabolites and other**  
27 **chemicals in hypersaline samples, enabling for the first time direct LC-MS-based exo-**  
28 **metabolomics analysis in sample matrices containing up to 2 molar total dissolved salts.**  
29 **The method, MetFish, is applicable to molecules containing amine, carboxylic acid,**  
30 **carbonyl, or hydroxyl functional groups, and can be integrated into either targeted or**  
31 **untargeted analysis pipelines. In targeted analyses, MetFish provided limits of**  
32 **quantification as low as 1 nM, broad linear dynamic ranges (up to 5-6 orders of magnitude)**  
33 **with excellent linearity, and low median inter-day reproducibility (e.g. 2.6%). MetFish was**  
34 **successfully applied in targeted and untargeted exo-metabolomics analyses of microbial**  
35 **consortia, quantifying amino acid dynamics in the exo-metabolome during community**  
36 **succession; *in situ* in a native prairie soil, whose exo-metabolome was isolated using a**  
37 **hypersaline extraction; and in input and produced fluids from a hydraulically fractured**  
38 **well, identifying dramatic changes in the exo-metabolome over time in the well.**

39

40

41           Microbial communities are ubiquitous and colonize a wide range of habitats and  
42 organisms, often thriving even in extreme environments with physicochemical conditions  
43 unsuitable for most other life forms. There is increasing evidence that microbial communities are  
44 responsible for a wide range of processes critical to the health of the ecosystems they inhabit and  
45 impact it in ways for which we currently have limited knowledge. Thriving in complex or  
46 extreme environments requires specific adaptations; therefore, studying these organisms lends  
47 evolutionary insight into microbial stress responses.<sup>1, 2</sup> The balance between cooperation and  
48 competition in harsh conditions contributes to the resistance and resilience of these  
49 communities,<sup>3-7</sup> and elucidating the role of chemical exchange and communication among  
50 members will provide an improved understanding of the underlying molecular mechanisms that  
51 might be exploited, as well as in the identification of beneficial natural products.<sup>8-14</sup> While  
52 metagenomics studies have been conducted to identify genes encoding novel biosynthetic  
53 pathways<sup>15-17</sup>, the measurement of primary and secondary metabolites in chemically extreme  
54 environments has been hampered by the complexities of the associated sample matrices.

55           Mass spectrometry is an indispensable analytical tool for identifying, quantifying and  
56 structurally characterizing chemical and biological molecules with high sensitivity and  
57 accuracy.<sup>18-21</sup> As the central workhorse for proteomics and metabolomics, liquid chromatography  
58 coupled with mass spectrometry (LC-MS) has played a critical role in the development of omics  
59 technologies that have enabled high throughput, systems biology investigations of organisms.<sup>22-24</sup>  
60 However, performing exo-metabolomics analyses in environmental samples can be challenging,  
61 due to the complexity of the associated sample matrices. A particular challenge is the presence of  
62 high (e.g. mM to M) concentrations of salts and minerals, which can compromise the extraction  
63 of metabolites from the samples, and suppress the ionization of metabolites during LC-MS

64 analysis, resulting in diminished or skewed quantitative performance.<sup>25-27</sup> Until now, samples  
65 consisting of or derived from such matrices have precluded the application of LC-MS-based  
66 measurements of metabolites and other small molecules.

67 To address this, we present MetFish, a method based on chemical tagging and extraction  
68 for comprehensive and quantitative measurement of metabolites and other small molecules in  
69 LC-MS-prohibitive matrices. Named for its ability to selectively fish metabolites of interest from  
70 sample matrices based upon common functional groups, MetFish is comprised of four simple  
71 and inexpensive chemical tags targeting amine, carboxyl, carbonyl, and hydroxyl functional  
72 groups and allows for sensitive quantification of low abundance metabolites in both targeted and  
73 untargeted approaches. The four functional groups targeted by MetFish represent over 89% and  
74 83% of the metabolites contained in the *E. coli* Metabolome and Plantcyc databases,  
75 respectively.<sup>28, 29</sup> The chemical tags can be either used in tandem for untargeted global analysis  
76 of the metabolome or individually to profile the sub-metabolome by targeting the molecules  
77 containing a specific functional group. MetFish uses low cost, commercially-available reagents  
78 that 1) could be used by researchers with diverse skill sets studying myriad sample types; 2)  
79 facilitate physical separation of metabolites from salt, mineral and other matrix components that  
80 interfere with quantitative LC-MS-based analysis; and 3) can be deployed *in situ* to minimize  
81 sample manipulation.

82 We demonstrate the utility and simplicity of MetFish in LC-MS-based exo-metabolomics  
83 analyses of three samples containing or derived from microbial communities from diverse  
84 ecosystems: a hypersaline aquatic microbial community, a prairie soil, and fluids injected into  
85 and produced from a hydraulically fractured well, each consisting of or derived from hypersaline  
86 (i.e. from 400 mM to 2 M) sample matrices. MetFish demonstrated excellent sensitivity,

87 reproducibility, and linear dynamic range, and is a simple, rapid and effective approach for  
88 addressing the needs of the broader research community.

89

## 90 **Results**

### 91 **Background and Overview of MetFish**

92 In our search for an effective and simple approach to separate metabolites from  
93 interfering matrix constituents such as high concentrations of salts, we evaluated several  
94 commercially available solid phase extraction (SPE) chemistries to capture metabolites from a  
95 hypersaline matrix (e.g. 2 M total dissolved salts) but all were unsuccessful (**Supplemental**  
96 **Table S1**). We determined that separation methods based on molecular weight (e.g., dialysis or  
97 size exclusion) were not suitable, since the masses of low molecular weight metabolites (e.g.  
98 glycine: 75.07 g/mol) overlap with those of salt components (e.g sulphate: 96.06 g/mol),  
99 resulting in loss of metabolites in the lower mass range. Subsequently, we explored chemical  
100 tagging and capture techniques, including metabolite enrichment by tagging and proteolytic  
101 release (METPR)<sup>30</sup> and a derivatization approach developed by Mattingly et al.<sup>30, 31</sup> Both  
102 approaches were time consuming and required significant solid/liquid phase chemical synthesis  
103 (e.g. up to 1 week for a single METPR probe for a researcher with basic organic synthesis skills)  
104 for preparing the capture or derivatization reagents. Moreover, these techniques were not  
105 amenable for the *in situ* capture of metabolites. Recognizing the need for a more efficient method  
106 that could be readily adopted by researchers from a broad range of disciplines, we adopted a  
107 suite of dansylated and related reagents coupled with downstream enrichment. The reagents were  
108 selected for their low cost, commercial availability and ease of use to increase accessibility of the  
109 method in the research community. Dansylation has been used for decades as a derivatization

110 method for quantification of amino acids based on fluorescence detection.<sup>32</sup> More recently, Li  
111 and colleagues have used dansylated and related reagents for targeted profiling of various sub-  
112 metabolomes using LC-MS.<sup>33-36</sup> We postulated that the derivatization chemistries associated  
113 with these reagents would be successful when applied in hypersaline matrices, and that we could  
114 then efficiently extract derivatized molecules from the samples and away from interfering salts.  
115 For MetFish, we selected dansylchloride, dansylhydrazine, dansylcadaverine, and 4-  
116 (dimethylamino)benzoyl chloride to specifically tag metabolites containing amine, carbonyl,  
117 carboxyl, and hydroxyl functional groups, respectively (**Fig. 1a**). The one-step derivatization  
118 reactions require as little as 10 minutes to a maximum of 120 minutes to couple the target  
119 metabolite (the ‘fish’) and the chemical tag (the ‘hook’), thus increasing its hydrophobicity and  
120 facilitating its extraction with organic solvent (the ‘line’) and concomitant enrichment from  
121 interfering components of the sample matrix (**Fig. 1b**). The tagged and extracted metabolites are  
122 subsequently analyzed using reversed phase liquid chromatography (LC) coupled with MS.<sup>33-36</sup>  
123 The reversed-phase LC includes inline solid phase extraction, which focuses the tagged  
124 metabolites prior to the analytical separation and separates them from any residual matrix  
125 components. Tandem MS (MS/MS) is used to fragment the tagged metabolites, resulting in  
126 fragment ions that are uniform for a given reagent and unique for a given metabolite,<sup>35</sup> providing  
127 identification confidence and metabolite specificity, respectively.

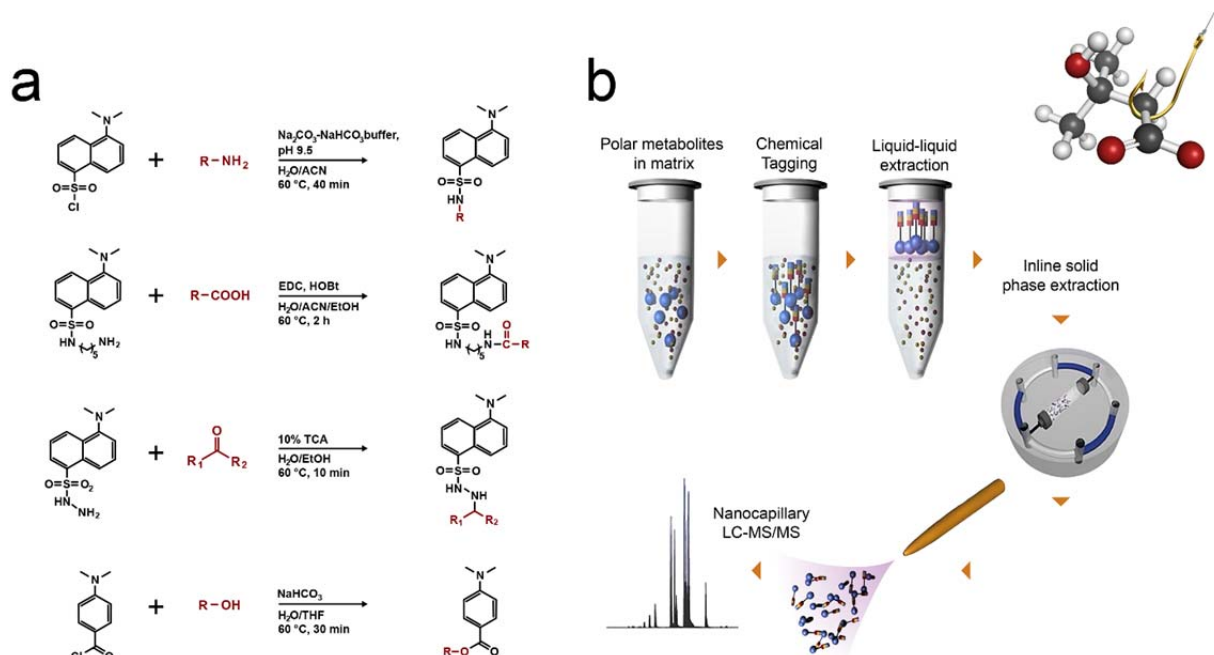

128

129 **Figure 1 | Overview of the MetFish method.** (a) MetFish reagents and associated derivatization  
130 reactions (b) General workflow of the MetFish method

131

132 Exceptions to the latter are some isomeric metabolites, such as leucine and isoleucine,  
133 which do not produce unique fragment ions during collision-induced dissociation. To illustrate  
134 this, the fragmentation spectrum for dansylated glycine is shown in **Fig. 2a**. Fragment ions due  
135 only to the dansyl moiety are e.g.  $m/z$  157, 170, and 252, whereas fragment ions due to dansyl-  
136 glycine are  $m/z$  263 and 294. Some amount of the molecular ion ( $m/z$  308) also appears in the  
137 MS/MS spectrum. All metabolites that have been tagged using the dansyl chloride reagent will  
138 generate the same fragment ions (e.g.  $m/z$  157, 170, and 234, and 252), providing confidence in  
139 detection of an appropriately tagged amine-containing metabolite. In contrast, each dansylated  
140 metabolite will also generate fragment ions that are specific to the dansyl-metabolite complex  
141 and proportional in  $m/z$  to the mass of the tagged metabolite. The other MetFish reagents also  
142 produce uniform and specific fragment ions upon dissociation (**Supplemental Table S2**). These

143 chemical characteristics enable MetFish reagents to be effective for both targeted and untargeted  
144 metabolomics applications. An added benefit is that differentially isotopically-labeled reagents  
145 can be used, allowing for the multi-plexing of labeled samples in untargeted metabolomics  
146 analysis, analogous to the iTRAQ and TMT peptide labeling approaches commonly used for  
147 multiplexing proteomics sample analyses using LC-MS/MS.<sup>37</sup> Differences in abundances of  
148 “reporter ions” from MS/MS fragmentation of differentially labeled reagent-metabolite  
149 complexes would be used to provide accurate relative or absolute metabolite quantification.  
150 Alternatively, labeled metabolites could be incorporated as internal standards in targeted  
151 metabolite analysis.<sup>33-36</sup> As shown in **Fig. 2a**, dansylated-<sup>13</sup>C and <sup>15</sup>N-glycine produces fragment  
152 ions specific to the dansyl-glycine complex and with mass shifts proportional to the degree and  
153 type of isotope labeling.

154

### 155 **Validation of MetFish**

156 To assess the effectiveness of MetFish for targeted metabolite analysis in MS-prohibitive  
157 samples, we analyzed a mixture of 19 proteinogenic amino acids in water containing 2 M MgSO<sub>4</sub>,  
158 with and without the MetFish method and using LC-MS/MS with the mass spectrometer  
159 operating in selected reaction monitoring (SRM) mode. MgSO<sub>4</sub> was chosen as it is a major salt  
160 component of Hot Lake, located in Oroville, WA, where a photoautotrophic microbial mat  
161 community resides and is available for study.<sup>38, 39</sup> In typical MS-based metabolomics analyses,  
162 amino acids would be enriched from samples using extraction with organic solvents or a solid  
163 phase. As described above and shown in **Supplemental Table S1**, SPE is not effective for  
164 extracting small polar molecules from matrices containing high salt concentrations. Liquid /  
165 liquid extraction of amino acids from high-salt matrices either carries over sufficient salt in the



166 extract to cause ionization suppression during analysis or does not effectively extract amino  
167 acids due to formation of amino acid-salt complexes that are insoluble in the organic solvent. As  
168 shown in **Fig. 2b, top panel**, analysis of a 25 pmol mixed amino acid standard dissolved in  
169 deionized water was straightforward using hydrophilic interaction liquid chromatography  
170 (HILIC)-MS/MS; however, no signal was observed above background for the same 25 pmol  
171 mixed amino acid standard dissolved in 2 M MgSO<sub>4</sub> (**Fig. 2b, middle panel**). Applying the  
172 MetFish method using the amine tagging reagent resulted in quantitative measurement of all  
173 amino acids using reversed-phase LC-MS/MS (**Fig. 2b, lower panel**). Because of the increased  
174 hydrophobicity of the tagged amino acids, their SRM signals were also more intense (due to  
175 enhanced electrospray ionization<sup>40</sup>) and they were better resolved chromatographically using  
176 reversed-phase LC compared to their native forms measured using HILIC. In the MetFish  
177 analyses the unique fragment ion from each singly charged, tagged amino acid was used for  
178 quantification purposes, and a fragment ion common to all tagged amino acids (e.g. *m/z* 157, 170,  
179 or 252) provided confident identification.

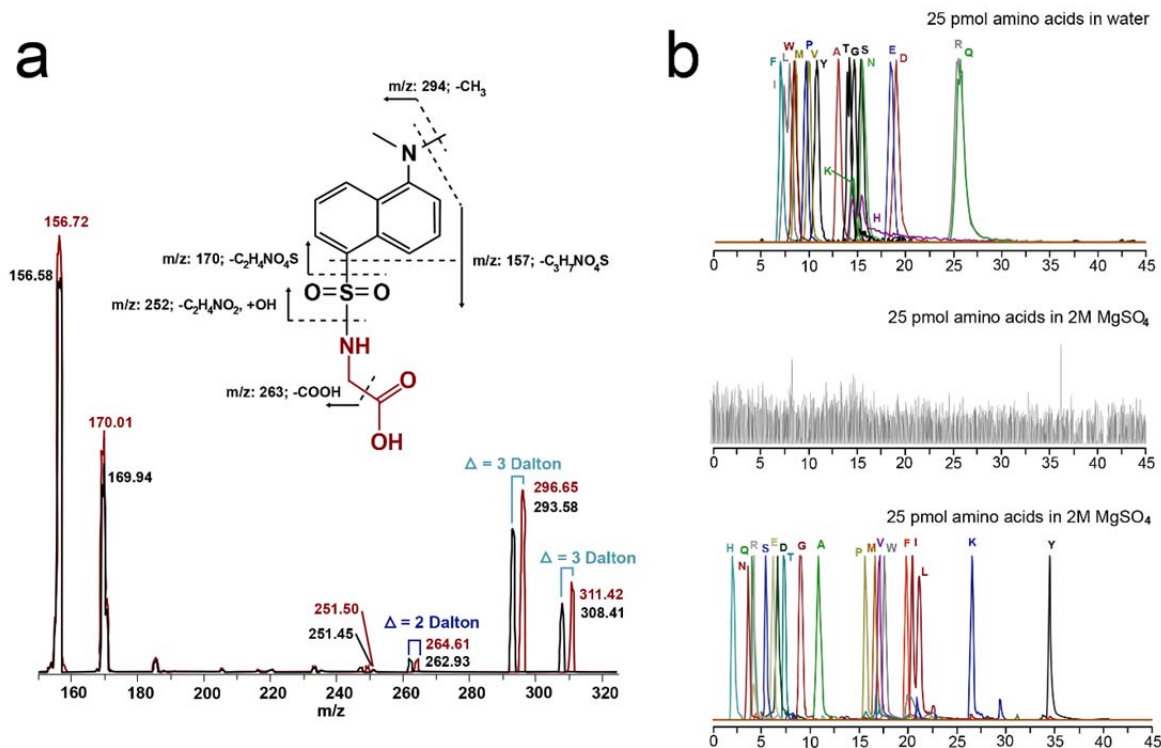

180

181 **Figure 2 | Validation of the MetFish method using amino acids.** (a) Tandem mass spectra from  
182 analysis of a mixture of unlabeled (black spectrum) and <sup>13</sup>C and <sup>15</sup>N-labeled glycine (red spectrum), both  
183 derivatized with dansyl chloride. The *m/z* of each fragment peak is listed, and the mass shifts due to the  
184 isotopic labels are indicated. (b) Amino acids in neat solution analyzed by nanocapillary LC-MS/MS  
185 without chemical tagging (upper chromatogram); amino acids in 2 M MgSO<sub>4</sub> analyzed by nanocapillary  
186 LC-MS/MS without chemical tagging (middle chromatogram); amino acids in 2 M MgSO<sub>4</sub>, derivatized  
187 using dansyl chloride, followed by extraction with organic solvent, and analyzed by nanocapillary LC-  
188 MS/MS with dansylation chemical tagging (lower chromatogram).

189

190 To demonstrate the broad applicability of the MetFish approach for detecting metabolites  
191 containing other functional groups, we analyzed metabolites containing carbonyl, carboxyl, and  
192 hydroxyl functional groups. As with amino acids (Figs. 2a and 3a), the MetFish method enabled  
193 quantification of metabolites with carboxylic acids (Fig. 3b), carbonyl (Fig. 3c), and hydroxyl  
194 groups, including sugars (Fig. 3d) and alcohols (Fig. 3e), all in water containing 2 M MgSO<sub>4</sub>.

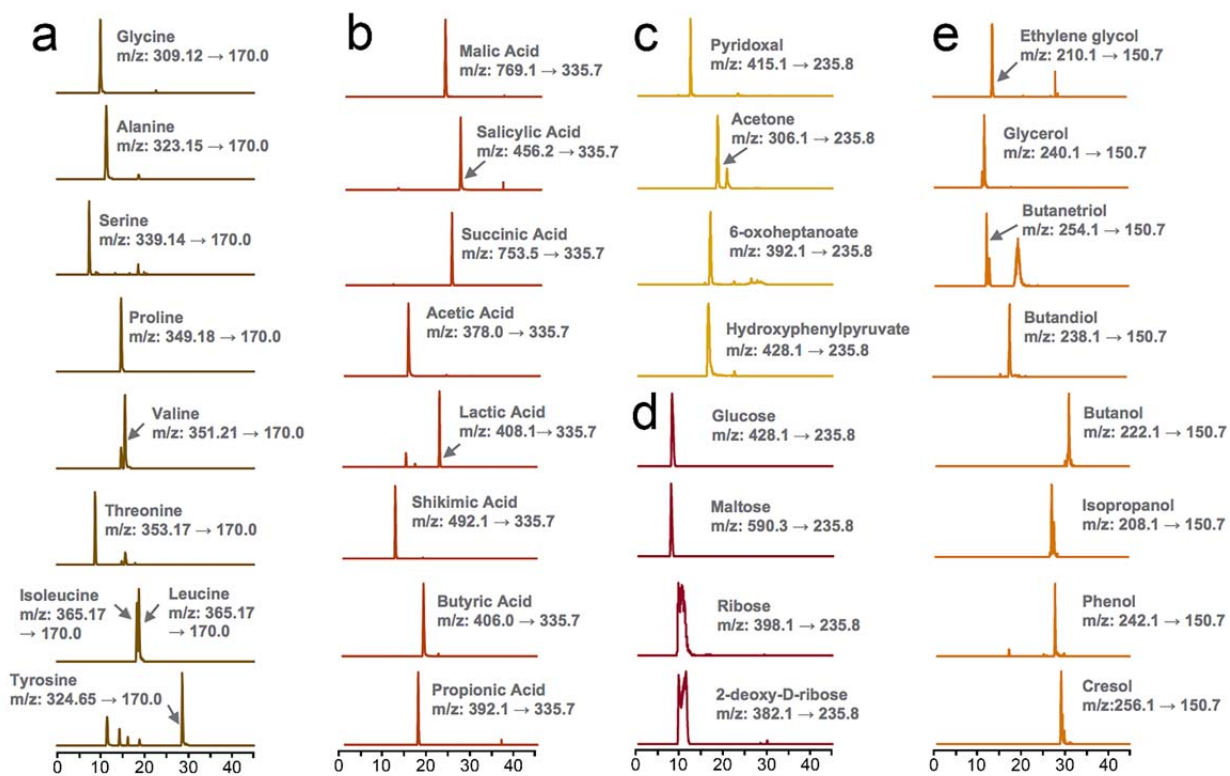

195

196 **Figure 3 | MetFish is applicable to measuring metabolites with a broad range of functional groups**  
197 **in challenging sample matrices.** Shown are data from application of MetFish in measurement of (a)  
198 amine metabolites, (b) carboxyl metabolites, (c) carbonyl metabolites, (d) hydroxyl metabolites as sugars,  
199 and (e) hydroxyl metabolites as alcohols. In all cases, MetFish was deployed *in situ* in metabolite-salt  
200 mixtures containing 2 M MgSO<sub>4</sub>.

201

202 To further validate MetFish, we determined limits of quantification (LOQ), linear dynamic  
203 ranges, and relative standard deviations (RSD) for all four MetFish reagents and in  
204 measurements of 45 metabolites containing amine, carboxyl, carbonyl, or hydroxyl functional  
205 groups (**Supplemental Tables S3-6**) dissolved in water containing 2 M total salt. The amine-  
206 tagging method provided the lowest LOQ (median of 5 nM), the broadest linear dynamic range  
207 (5-6 orders of magnitude), and the lowest median inter-day reproducibility (median of 2.6%) of  
208 the four methods, based on data for 19 proteinogenic amino acids (**Supplemental Table S3**).  
209 The other tags showed median LOQs ranging from 40 nM (carboxyl; 10 metabolites) to 3.5 μM

210 (hydroxyl; 8 metabolites), linear dynamic ranges of 3-5 orders of magnitude, and median inter-  
211 day RSD of 3.3% (carboxyl; 10 metabolites) to 9.3% (hydroxyl; 8 metabolites) (**Supplemental**  
212 **Tables S4-6**). The hydroxyl tagging approach gave the highest LOQ, ranging from sub to low  
213 micromolar. All four MetFish tags showed excellent linearity over the dynamic range of  
214 quantification with  $R^2$  of 0.99 (**Supplemental Tables S3-6**).

215

## 216 **Application of MetFish in targeted analyses of proteinogenic amino acids in hypersaline** 217 **matrices**

218 After validating that the MetFish method can be used to enrich polar metabolites from a  
219 model hypersaline solution, we then applied the amine capture reagent in quantification of amino  
220 acids in exo-metabolomics analyses of two microbial communities: 1) a uni-cyanobacterial  
221 phototrophic microbial community and 2) a prairie soil.

222 MetFish was used to examine nitrogen metabolism over a 28-day succession in a  
223 uncyanobacterial consortial biofilm isolated from a benthic phototrophic microbial mat from a  
224 highly saline alkaline lake in northern Washington state.<sup>38, 39, 41</sup> During the seasonal cycle, the  
225 salt concentration in the lake fluctuates from low hundreds of mM to well over 2 M total  
226 dissolved salts (primarily  $MgSO_4$ ); the consortium in this experiment was therefore cultured in a  
227 defined medium containing 400 mM  $MgSO_4$  (see medium composition in **Supplemental Table**  
228 **S7** for full details). As organisms in the consortium are divergent for their ability to incorporate  
229 nitrate,<sup>42</sup> this experiment aimed to determine how differences in the organismal access to  
230 nitrogen for amino acid biosynthesis influenced community dynamics and metabolite exchange.  
231 To test the hypothesis that availability of reduced nitrogen would increase the rate of amino acid  
232 sharing, the nitrate-containing growth medium was amended with either ammonium or urea. The

233 samples were spiked with  $^{13}\text{C}$  and  $^{15}\text{N}$ -labeled amino acid standards, and endogenous amino  
 234 acids in the media were quantified using isotope dilution MS. The MetFish analysis quantified  
 235 14 extracellular proteinogenic amino acids over a 17-day cultivation period (**Fig. 4a**). In general,  
 236 amino acid concentrations increased to detectable levels early in

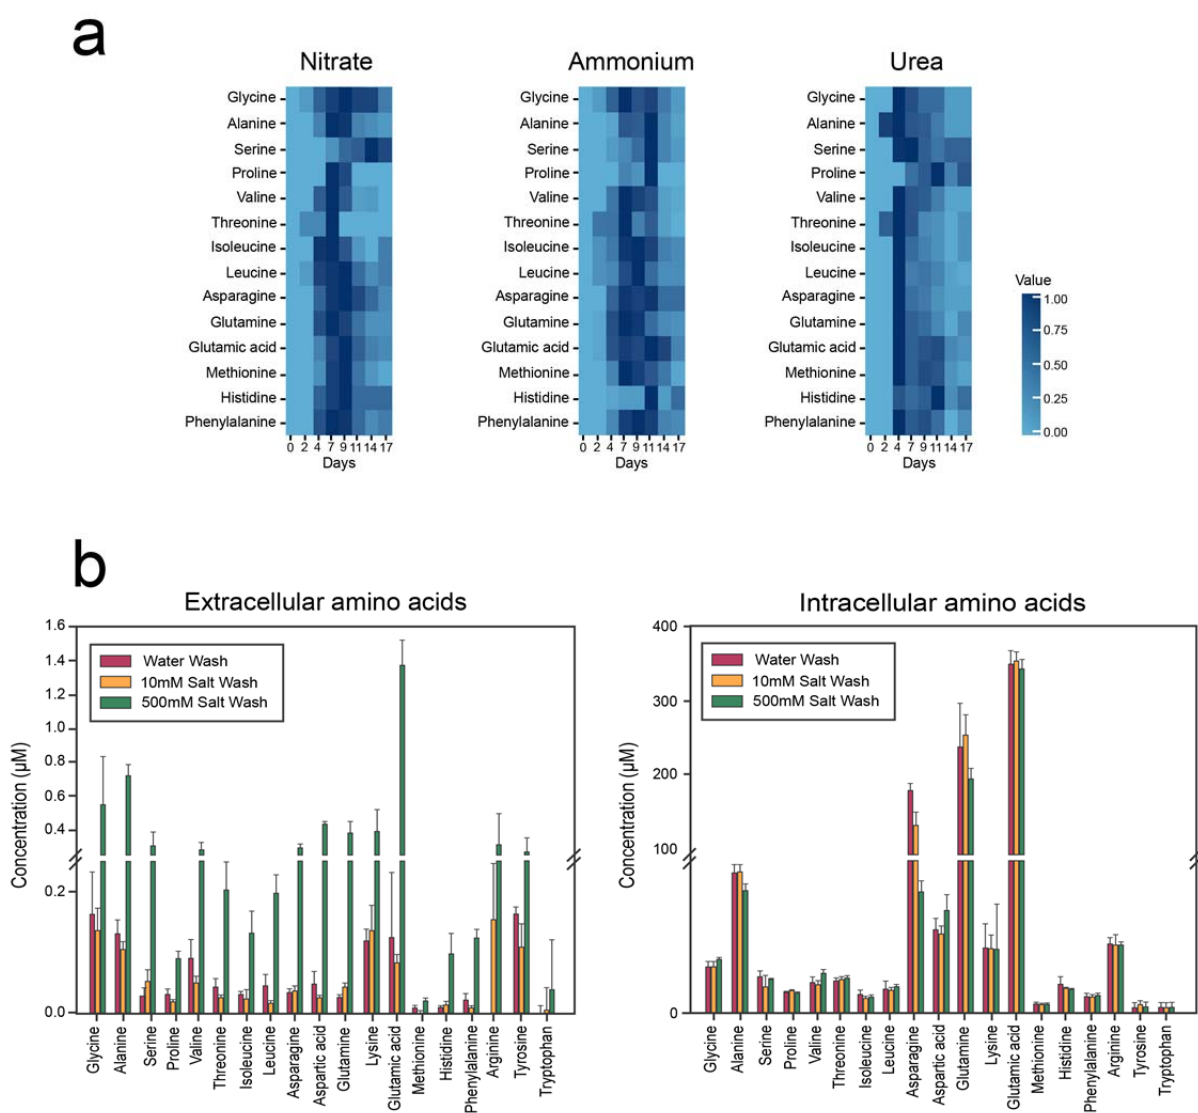

237  
 238 **Figure 4 | Application of MetFish in quantification of proteinogenic amino acids in representative**  
 239 **microbial communities.** (a) Quantification of amino acids during phototrophic microbial community  
 240 succession with various nitrogen amendments (data shown are normalized average amino acid  
 241 concentrations from analysis of 3 replicate succession experiments). (b) Exo- and endometabolomics  
 242 analysis of amino acids in soil, using a high salt wash to increase recovery due to possible disruption of

243 non-specific binding to soil particles (data shown are mean  $\pm$  standard deviation from analysis of 3  
244 replicate soil samples).  
245

246 cultivation until they reached a maximum at ~7-9 d, for nitrite and ammonium, or 4 d for urea,  
247 and decreased thereafter. Surprisingly, this trend did not hold true for all amino acids. For  
248 example, serine reached a maximum concentration at 14 d in medium amended with nitrate and  
249 at 11 d for ammonium. For proline, the maximum extracellular concentration occurred at 11 d  
250 for both ammonium and urea. The exo-metabolomics analysis of amino acid profiles during the  
251 phototrophic consortia succession revealed that availability of extracellular amino acids as  
252 community “public goods” differed among nitrogen sources at the level of individual amino  
253 acids. MetFish therefore enabled us to conclude that the nitrogen source for amino acid  
254 biosynthesis rewires overall community amino acid exchange.

255         We next used MetFish in exo-metabolomics analyses to quantify free proteinogenic  
256 amino acids in soil, followed by analysis of biomass-associated molecules. To do so, we  
257 modified the classic fumigation-extraction method<sup>43</sup> for measuring microbial biomass-associated  
258 carbon content. In the traditional format, soil samples are fumigated with chloroform to lyse  
259 microbial cells, followed by immediate extraction with 500 mM K<sub>2</sub>SO<sub>4</sub>, which extracts the total  
260 of free and biomass-associated molecules but cannot be used to distinguish between the two.<sup>44-46</sup>  
261 Makarov and colleagues reported that microbial biomass-associated carbon is increasingly  
262 extractable with increasing concentration of the K<sub>2</sub>SO<sub>4</sub> extraction solution, with solubility  
263 increases of 1.5 - 3.9-fold in 500 mM K<sub>2</sub>SO<sub>4</sub> compared with 50 mM K<sub>2</sub>SO<sub>4</sub>.<sup>47</sup> We therefore  
264 hypothesized that performing a 500 mM K<sub>2</sub>SO<sub>4</sub> extraction of soil *prior* to microbial cell lysis  
265 would allow us to obtain higher recovery of molecules located in the extracellular milieu, and  
266 also enable us to follow up with a subsequent measurement of microbial biomass-associated  
267 molecules. Because the hypersaline environment of the salt extract would otherwise prohibit a

268 LC-MS-based exo-metabolomics analysis, MetFish was employed. We used three different  
269 extractants – deionized water, 10 mM K<sub>2</sub>SO<sub>4</sub>, and 500 mM K<sub>2</sub>SO<sub>4</sub> – to extract amino acids from  
270 a native prairie soil at the Konza Prairie Biological Station, a long-term ecological research site  
271 located in eastern Kansas, U.S.A. We extracted equivalent size aliquots of soil in replicate  
272 accordingly (see **Supplemental Methods** for details), and subsequently spiked the extracts with  
273 <sup>13</sup>C and <sup>15</sup>N-labeled amino acid standards and applied the amine-tagging MetFish reagent. The  
274 extracted soil remaining was then subjected to bead beating to lyse microbial cells, followed by  
275 spiking with labeled standards and derivatization of amino acids directly in the soil samples,  
276 demonstrating *in situ* applicability of MetFish. Nineteen proteinogenic amino acids in both the  
277 free and biomass-associated extracts were quantified using isotope dilution MS (**Fig. 4b**). As  
278 expected, pre-extraction of the soil with 500 mM K<sub>2</sub>SO<sub>4</sub> resulted in 2-10-fold higher recovery of  
279 amino acids from the extracellular milieu compared to pre-extraction with water and 10 mM  
280 K<sub>2</sub>SO<sub>4</sub>. Asparagine, glutamine, glutamic acid were the three most abundant biomass-associated  
281 amino acids with concentrations of 70.9 μM/mg, 191.7 μM/mg, and 337.7 μM/mg soil,  
282 respectively (**Fig. 4b**). Intracellular levels of amino acids were similar between the three  
283 different pre-extractants.

284

## 285 **Application of MetFish in untargeted metabolomics analysis of fluids injected into and** 286 **produced from a hydraulically fractured well**

287 As described above, each MetFish reagent generates one or more tag-specific fragment  
288 ions during collision-induced dissociation during MS analysis. These “reporter ions” can be  
289 exploited in untargeted exo-metabolomics analyses to broadly query the metabolome in  
290 otherwise MS-prohibitive sample matrices. To demonstrate this, we applied all 4 MetFish

291 reagents in parallel analyses of fluids injected into and produced from a hydraulically fractured  
292 well from the Utica-Point Pleasant shale (Ohio, U.S.A.), and operating the mass spectrometer in  
293 data-dependent MS/MS mode to obtain comprehensive untargeted data (**Fig 5a**). Although the  
294 complete composition of fracture fluid is typically proprietary, the fracking fluid used in our  
295 analyses was known to be complex,

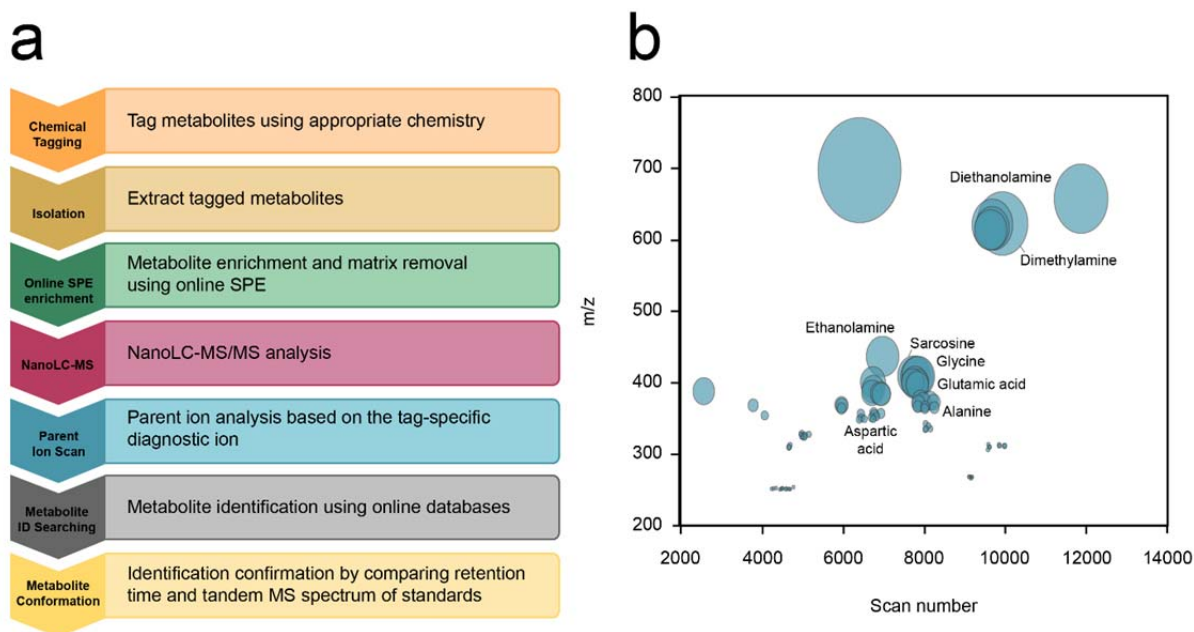

296  
297 **Figure 5 | (a) Workflow for untargeted metabolomics analysis using MetFish. (b) Global metabolite**  
298 **profile of a produced fluid sample.** Data from all 4 MetFish reagents were combined into a single plot  
299 of  $m/z$  vs MS scan number. The size of the circle is proportional to the ion intensity, and putatively  
300 identified metabolites are labeled.

301  
302 with up 125 g / L total dissolved solids, including salts, various corrosion inhibitors, and gelling  
303 agents. We initially applied all 4 MetFish reagents in untargeted exo-metabolomics analysis of a  
304 representative produced fluid sample, in order to identify as many putative molecules as possible  
305 (see **Supplemental Methods** for details) (**Fig 5b**). We then purchased isotopically-labeled  
306 standards for putatively identified metabolites, and applied MetFish in a targeted exo-



307 metabolomics analysis to confirm molecular identities in a time series of produced fluid samples  
308 ranging from 86 and 154 d post-injection (**Fig. 6a**). Using this approach, we confirmed the  
309 identities of 37 metabolites. As shown in **Fig. 6a**, fluids initially produced from the well at 86-98  
310 d showed higher amounts of amino acids than those at 105 and 154 d, while the concentrations of  
311 most alcohols and organic acids detected were evenly distributed over the time course.  
312 Compared to the input fluids, the metabolite concentrations in produced fluid samples show  
313 significant differences (**Fig. 6b**). Metabolites such as amino acids and organic acids have  
314 significantly higher concentrations in produced fluid samples than in the input fluids, indicating  
315 the presence of metabolically active microbial communities. The input fluids also contained  
316 extremely high levels of diols, such as propylene glycol, which are typical additives in hydraulic  
317 fracture fluids.

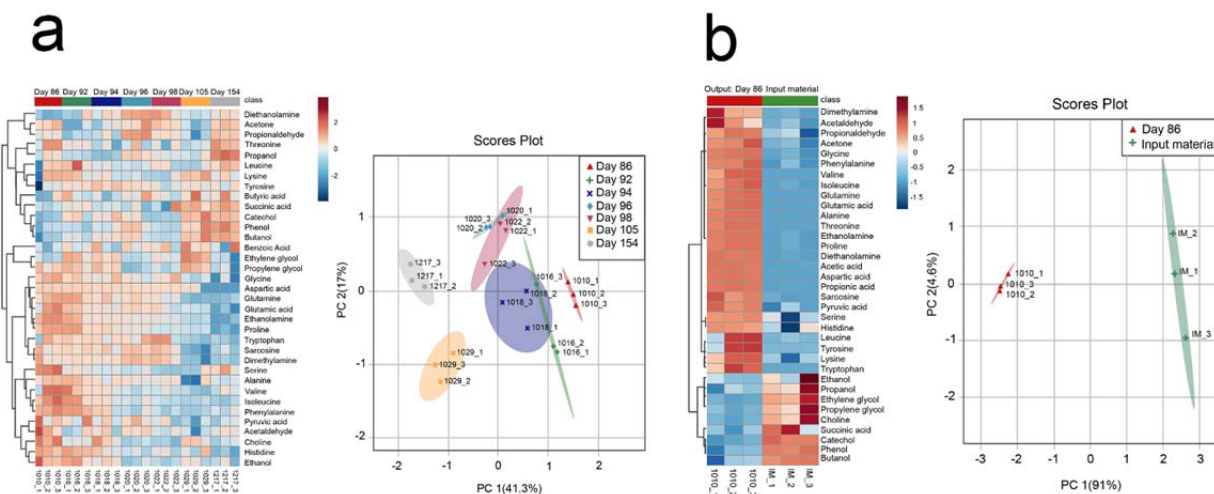

318  
319 **Figure 6 | Targeted metabolomics analysis using MetFish in injected and produced fluids from**  
320 **hydraulic fracturing (a) Quantification of 37 metabolites identified by targeted MetFish (b) Comparison**  
321 **of metabolite levels in the input material and spent fracking fluid. Data shown are from replicate analysis**  
322 **(n = 3) of each fluid sample.**

323

## 324 Discussion

325           In summary, the MetFish method enables highly sensitive targeted and untargeted exo-  
326 metabolomics measurements in chemically extreme environments that are otherwise prohibitive  
327 to MS-based analyses. We demonstrated use of MetFish in quantification of exo-metabolites in  
328 hypersaline matrices, including spent media from a phototrophic microbial consortium, salt-  
329 extracted soil, and injected/produced fluids from hydraulic fracturing. The combination of a high  
330 salt wash and MetFish was particularly useful for extracting metabolites from the extracellular  
331 soil milieu, prior to subsequent *in situ* application of MetFish for analysis of intracellular  
332 metabolites in the same samples after microbial cell lysis. The use of MetFish offers control over  
333 the sub-class of metabolites being captured, which greatly constrains the chemical search space  
334 when attempting to identify unknowns during untargeted exo-metabolomics analysis. This is  
335 particularly useful for samples containing a diversity of high concentration organic constituents,  
336 such as soils or those produced from hydrocarbon-bearing, hydraulically-fractured wells. We  
337 believe that such an approach will aid in the investigation of metabolite exchange in microbial  
338 communities and provide a more effective way to understand the microbial metabolism in  
339 extreme ecosystems that remain understudied.

340

#### 341 **Acknowledgements**

342           This research was supported by the Genomic Science Program (GSP), Office of  
343 Biological and Environmental Research (OBER), U.S. Department of Energy (DOE), and is a  
344 contribution of the Metabolic and Spatial Interactions in Communities Scientific Focus Area.  
345 Additional support was provided by the Pacific Northwest National Laboratory (PNNL),  
346 Laboratory Directed Research and Development program via the Microbiomes in Transition  
347 Initiative. P.J.M was partially supported by funding from the National Sciences Foundation

348 Dimensions of Biodiversity (award no. 1342701). The authors thank Susan Welch with the Ohio  
349 State University Subsurface Energy Materials Characterization and Analysis Laboratory  
350 (SEMCAL) for field sampling assistance as well as Kelly Wrighton, Mike Wilkins, and Kayla  
351 Borton for providing samples and their preparation; Dr. Aaron Wright of PNNL for useful  
352 discussions and assistance with the MetFish derivatization reactions; and Drs. Charles Rice and  
353 Ari Jumpponen at Kansas State University for providing the soil samples. Targeted and  
354 untargeted metabolomics analyses using MetFish were performed in the Environmental  
355 Molecular Sciences Laboratory, a national scientific user facility sponsored by the U.S. OBER  
356 and located at PNNL in Richland, Washington. PNNL is a multi-program national laboratory  
357 operated by Battelle for the DOE under Contract DE-AC05-76RLO 1830.

358

#### 359 **Author contributions**

360 C.X. and T.O.M. conceived and designed the method and studies. S.R.L., T.R.C., R.Z., R.J.M.,  
361 J.K.J., V.L.B., P.J.M., and M.F.R. contributed materials and assisted with experimental design.  
362 C.X., R.L.S., N.G.I., Y.M., and B.R.M. performed experiments and data analysis. M.F.R. and  
363 J.K.F. provided funding and critical review of the manuscript. C.X., S.P.C. and T.O.M.  
364 performed data analysis, interpreted results, and wrote the manuscript. All authors read and  
365 approved the final manuscript.

366

#### 367 **Data availability**

368 The data that support the findings of this study are available upon request.

369

#### 370 **References**

- 371 1. Deneff, V.J., Mueller, R.S. & Banfield, J.F. AMD biofilms: using model communities to study  
372 microbial evolution and ecological complexity in nature. *The ISME journal* **4**, 599-610 (2010).
- 373 2. Hemme, C.L. et al. Metagenomic insights into evolution of a heavy metal-contaminated  
374 groundwater microbial community. *The ISME journal* **4**, 660-672 (2010).
- 375 3. Song, H.S., Renslow, R.S., Fredrickson, J.K. & Lindemann, S.R. Integrating Ecological and  
376 Engineering Concepts of Resilience in Microbial Communities. *Front Microbiol* **6**, 1298 (2015).
- 377 4. Konopka, A., Lindemann, S. & Fredrickson, J. Dynamics in microbial communities: unraveling  
378 mechanisms to identify principles. *ISME J* **9**, 1488-1495 (2015).
- 379 5. Wilson, C.E. et al. Cooperation and competition shape ecological resistance during periodic  
380 spatial disturbance of engineered bacteria. *Sci Rep* **7**, 440 (2017).
- 381 6. Embree, M., Liu, J.K., Al-Bassam, M.M. & Zengler, K. Networks of energetic and metabolic  
382 interactions define dynamics in microbial communities. *Proc Natl Acad Sci U S A* **112**, 15450-  
383 15455 (2015).
- 384 7. Feng, K. et al. Biodiversity and species competition regulate the resilience of microbial biofilm  
385 community. *Mol Ecol* **26**, 6170-6182 (2017).
- 386 8. Fredrickson, J.K. ECOLOGY. Ecological communities by design. *Science* **348**, 1425-1427 (2015).
- 387 9. Mee, M.T., Collins, J.J., Church, G.M. & Wang, H.H. Syntrophic exchange in synthetic microbial  
388 communities. *Proceedings of the National Academy of Sciences of the United States of America*  
389 **111**, E2149-E2156 (2014).
- 390 10. Phelan, V.V., Liu, W.-T., Pogliano, K. & Dorrestein, P.C. Microbial metabolic exchange - the  
391 chemotype-to-phenotype link. *Nature Chemical Biology* **8**, 26-35 (2012).
- 392 11. Anderson, J.C. et al. Decreased abundance of type III secretion system-inducing signals in  
393 *Arabidopsis* mkp1 enhances resistance against *Pseudomonas syringae*. *Proceedings of the*  
394 *National Academy of Sciences of the United States of America* **111**, 6846-6851 (2014).
- 395 12. Bednarek, P. Chemical warfare or modulators of defence responses - the function of secondary  
396 metabolites in plant immunity. *Current Opinion in Plant Biology* **15**, 407-414 (2012).
- 397 13. Berdy, J. Bioactive microbial metabolites. *The Journal of antibiotics* **58**, 1-26 (2005).
- 398 14. Harvey, A.L., Edrada-Ebel, R. & Quinn, R.J. The re-emergence of natural products for drug  
399 discovery in the genomics era. *Nature Reviews Drug Discovery* **14**, 111-129 (2015).
- 400 15. Keller, M. & Zengler, K. Tapping into microbial diversity. *Nature Reviews Microbiology* **2**, 141-150  
401 (2004).
- 402 16. Payne, D.J., Gwynn, M.N., Holmes, D.J. & Pompliano, D.L. Drugs for bad bugs: confronting the  
403 challenges of antibacterial discovery. *Nature reviews Drug discovery* **6**, 29-40 (2007).
- 404 17. Pan, G. et al. Discovery of the leinamycin family of natural products by mining actinobacterial  
405 genomes. *Proceedings of the National Academy of Sciences*, 201716245 (2017).
- 406 18. Aebersold, R. & Mann, M. Mass-spectrometric exploration of proteome structure and function.  
407 *Nature* **537**, 347-355 (2016).
- 408 19. Want, E.J., Cravatt, B.F. & Siuzdak, G. The expanding role of mass spectrometry in metabolite  
409 profiling and characterization. *Chembiochem* **6**, 1941-1951 (2005).
- 410 20. Wang, Z. et al. Gut flora metabolism of phosphatidylcholine promotes cardiovascular disease.  
411 *Nature* **472**, 57-63 (2011).
- 412 21. Mehmood, S. et al. Mass spectrometry captures off-target drug binding and provides  
413 mechanistic insights into the human metalloprotease ZMPSTE24. *Nature chemistry* (2016).
- 414 22. Wilhelm, M. et al. Mass-spectrometry-based draft of the human proteome. *Nature* **509**, 582-587  
415 (2014).
- 416 23. Girolamo, F.D., Lante, I., Muraca, M. & Putignani, L. The role of mass spectrometry in the "omics"  
417 era. *Current organic chemistry* **17**, 2891-2905 (2013).

- 418 24. Patti, G.J., Yanes, O. & Siuzdak, G. Innovation: Metabolomics: the apogee of the omics trilogy.  
419 *Nature reviews Molecular cell biology* **13**, 263-269 (2012).
- 420 25. King, R., Bonfiglio, R., Fernandez-Metzler, C., Miller-Stein, C. & Olah, T. Mechanistic investigation  
421 of ionization suppression in electrospray ionization. *Journal of the American Society for Mass*  
422 *Spectrometry* **11**, 942-950 (2000).
- 423 26. Sterner, J., Johnston, M., Nicol, G. & Ridge, D. Signal suppression in electrospray ionization  
424 Fourier transform mass spectrometry of multi - component samples. *Journal of Mass*  
425 *Spectrometry* **35**, 385-391 (2000).
- 426 27. Bonfiglio, R., King, R.C., Olah, T.V. & Merkle, K. The effects of sample preparation methods on  
427 the variability of the electrospray ionization response for model drug compounds. *Rapid*  
428 *Communications in Mass Spectrometry* **13**, 1175-1185 (1999).
- 429 28. Sajed, T. et al. ECMDDB 2.0: A richer resource for understanding the biochemistry of E. coli.  
430 *Nucleic Acids Res* **44**, D495-501 (2016).
- 431 29. Dreher, K. in *Plant Metabolism: Methods and Protocols*. (ed. G. Sriram) 151-171 (Humana Press,  
432 Totowa, NJ; 2014).
- 433 30. Carlson, E.E. & Cravatt, B.F. Chemoselective probes for metabolite enrichment and profiling.  
434 *Nature methods* **4**, 429-435 (2007).
- 435 31. Mattingly, S.J., Xu, T., Nantz, M.H., Higashi, R.M. & Fan, T.W.-M. A carbonyl capture approach for  
436 profiling oxidized metabolites in cell extracts. *Metabolomics* **8**, 989-996 (2012).
- 437 32. Gros, C. & Labouesse, B. Study of the dansylation reaction of amino acids, peptides and proteins.  
438 *The FEBS Journal* **7**, 463-470 (1969).
- 439 33. Guo, K. & Li, L. Differential 12C-/13C-isotope dansylation labeling and fast liquid  
440 chromatography/mass spectrometry for absolute and relative quantification of the metabolome.  
441 *Analytical chemistry* **81**, 3919-3932 (2009).
- 442 34. Zhao, S., Dawe, M., Guo, K. & Li, L. Development of High-Performance Chemical Isotope Labeling  
443 LC-MS for Profiling the Carbonyl Submetabolome. *Analytical Chemistry* (2017).
- 444 35. Zhao, S., Luo, X. & Li, L. Chemical Isotope Labeling LC-MS for High Coverage and Quantitative  
445 Profiling of the Hydroxyl Submetabolome in Metabolomics. *Analytical chemistry* **88**, 10617-  
446 10623 (2016).
- 447 36. Guo, K. & Li, L. High-performance isotope labeling for profiling carboxylic acid-containing  
448 metabolites in biofluids by mass spectrometry. *Analytical chemistry* **82**, 8789-8793 (2010).
- 449 37. Thompson, A. et al. Tandem mass tags: a novel quantification strategy for comparative analysis  
450 of complex protein mixtures by MS/MS. *Analytical chemistry* **75**, 1895-1904 (2003).
- 451 38. Lindemann, S.R. et al. The epsomitic phototrophic microbial mat of Hot Lake, Washington:  
452 community structural responses to seasonal cycling. *Frontiers in microbiology* **4** (2013).
- 453 39. Cole, J.K. et al. Phototrophic biofilm assembly in microbial-mat-derived unicyanobacterial  
454 consortia: model systems for the study of autotroph-heterotroph interactions. *Frontiers in*  
455 *microbiology* **5** (2014).
- 456 40. Fenn, J.B., Mann, M., Meng, C.K., Wong, S.F. & Whitehouse, C.M. Electrospray ionization for  
457 mass spectrometry of large biomolecules. *Science* **246**, 64-71 (1989).
- 458 41. Zachara, J.M. et al. Geo- and biogeochemical processes in a heliothermal hypersaline lake.  
459 *Geochimica et Cosmochimica Acta* **181**, 144-163 (2016).
- 460 42. Lindemann, S.R. et al. Predicting Species-Resolved Macronutrient Acquisition during Succession  
461 in a Model Phototrophic Biofilm Using an Integrated 'Omics Approach. *Front Microbiol* **8**, 1020  
462 (2017).
- 463 43. Vance, E.D., Brookes, P.C. & Jenkinson, D.S. Microbial Biomass Measurements in Forest Soils -  
464 the Use of the Chloroform Fumigation Incubation Method in Strongly Acid Soils. *Soil Biol*  
465 *Biochem* **19**, 697-702 (1987).

- 466 44. Brookes, P.C., Landman, A., Pruden, G. & Jenkinson, D.S. Chloroform Fumigation and the Release  
467 of Soil-Nitrogen - a Rapid Direct Extraction Method to Measure Microbial Biomass Nitrogen in  
468 Soil. *Soil Biol Biochem* **17**, 837-842 (1985).
- 469 45. Vance, E.D., Brookes, P.C. & Jenkinson, D.S. An extraction method for measuring soil microbial  
470 biomass C. *Soil Biology and Biochemistry* **19**, 703-707 (1987).
- 471 46. Tate, K.R., Ross, D.J. & Feltham, C.W. A Direct Extraction Method to Estimate Soil Microbial-C -  
472 Effects of Experimental-Variables and Some Different Calibration Procedures. *Soil Biol Biochem*  
473 **20**, 329-335 (1988).
- 474 47. Makarov, M.I., Shuleva, M.S., Malysheva, T.I. & Menyailo, O.V. Solubility of the Labile Forms of  
475 Soil Carbon and Nitrogen in K<sub>2</sub>SO<sub>4</sub> of Different Concentrations. *Eurasian Soil Sci+* **46**, 369-374  
476 (2013).

477
